# Supplementary material for: Role of Tf2N− anions in the ionic liquid–water distribution of europium(iii) chelates
Source: Royal Society of Chemistry journal article supplement (doi:10.1039/c6ra27208h), 2017-01-01
Supplement: c6ra27208h1.pdf [file c6ra27208h1.pdf]

## Supporting Information

### **Role of $\text{Tf}_2\text{N}^-$ anions in the ionic liquid–water distribution of europium(III) chelates**

Hiroyuki Okamura,<sup>\*a</sup> Noboru Aoyagi,<sup>b</sup> Kojiro Shimojo,<sup>a</sup> Hirochika Naganawa<sup>a</sup> and Hisanori Imura<sup>\*c</sup>

<sup>a</sup>*Advanced Science Research Center, Japan Atomic Energy Agency, Tokai, Ibaraki 319-1195, Japan. E-mail: okamura.hiroyuki@jaea.go.jp*

<sup>b</sup>*Nuclear Science and Engineering Center, Japan Atomic Energy Agency, Tokai, Ibaraki 319-1195, Japan*

<sup>c</sup>*Faculty of Chemistry, Institute of Science and Engineering, Kanazawa University, Kakuma, Kanazawa 920-1192, Japan. E-mail: imura@se.kanazawa-u.ac.jp*

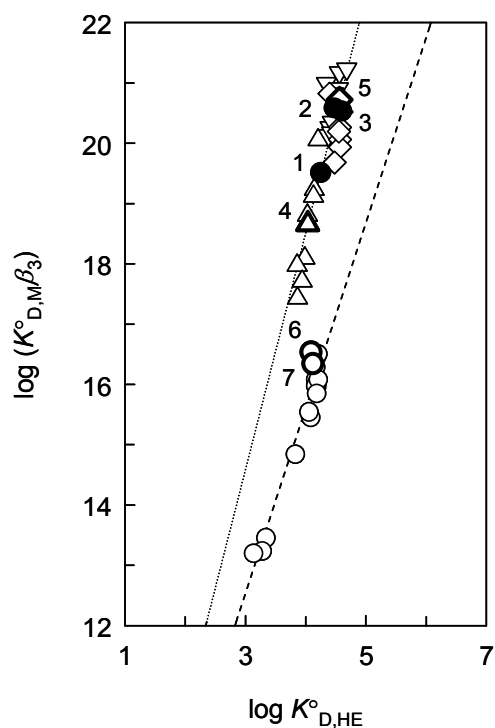

**Fig. S1** Relationship between  $\log (K^{\circ}_{D,M}\beta_3)$  of the neutral  $\text{Eu}(\text{tta})_3$  chelate and  $\log K^{\circ}_{D,HE}$  of the enol form of 2-thenyltrifluoroacetone (Htta). (●),  $[\text{C}_n\text{mim}][\text{Tf}_2\text{N}]$ ; (○), alkanes, aromatic hydrocarbons, and chlorohydrocarbons;<sup>1,2</sup> (◇), ketones;<sup>3,4</sup> (△), ethers;<sup>1</sup> (▽), esters.<sup>3,5</sup> 1,  $[\text{C}_4\text{mim}][\text{Tf}_2\text{N}]$ ; 2,  $[\text{C}_6\text{mim}][\text{Tf}_2\text{N}]$ ; 3,  $[\text{C}_8\text{mim}][\text{Tf}_2\text{N}]$ ; 4, diisopropyl ether (DIPE); 5, isobutyl methyl keton (MIBK); 6, benzene; 7, 1,2-dichloroethane (DCE). The respective straight lines were obtained by a least-squares fitting for the oxygen-containing organic solvents (dotted line) and for alkanes, aromatic hydrocarbons, and chlorohydrocarbons (dashed line).

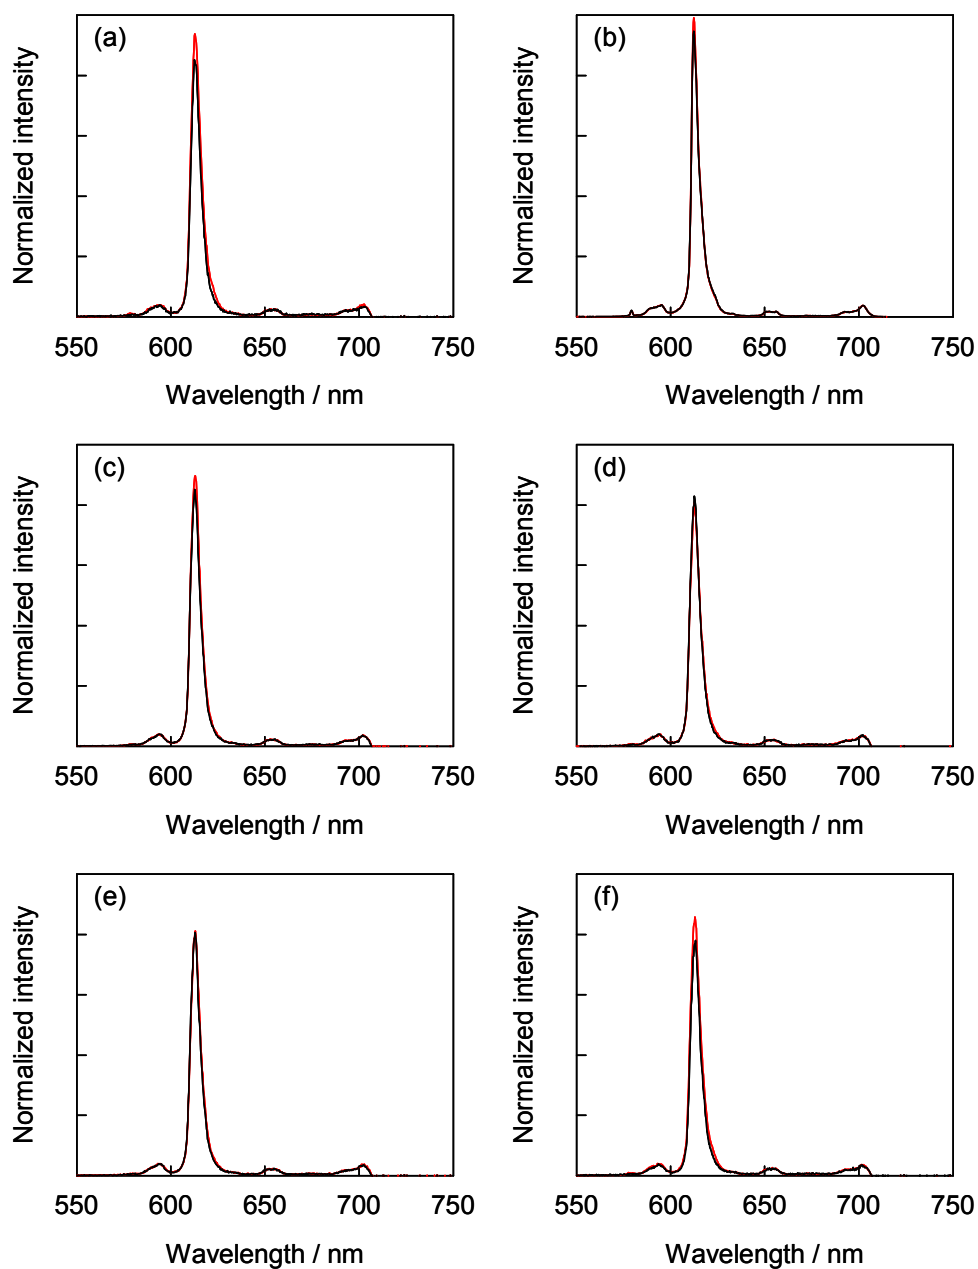

**Fig. S2** Fluorescence spectrum of  $[\text{Eu}(\text{tta})_3(\text{H}_2\text{O})_3]$  in  $[\text{C}_2\text{mim}][\text{Tf}_2\text{N}]$  (a),  $[\text{C}_4\text{mim}][\text{Tf}_2\text{N}]$  (b),  $[\text{C}_6\text{mim}][\text{Tf}_2\text{N}]$  (c),  $[\text{C}_8\text{mim}][\text{Tf}_2\text{N}]$  (d),  $[\text{C}_{10}\text{mim}][\text{Tf}_2\text{N}]$  (e), and  $[\text{C}_4\text{dmim}][\text{Tf}_2\text{N}]$  (f) saturated with  $\text{H}_2\text{O}$  (black) and  $\text{D}_2\text{O}$  (red) following pulsed 394 nm excitation. The spectra were normalized by the intensity of the  ${}^5\text{D}_0 \rightarrow {}^7\text{F}_1$  transition. Concentration of  $[\text{Eu}(\text{tta})_3(\text{H}_2\text{O})_3]$  was  $1.0 \times 10^{-4} \text{ mol dm}^{-3}$ .

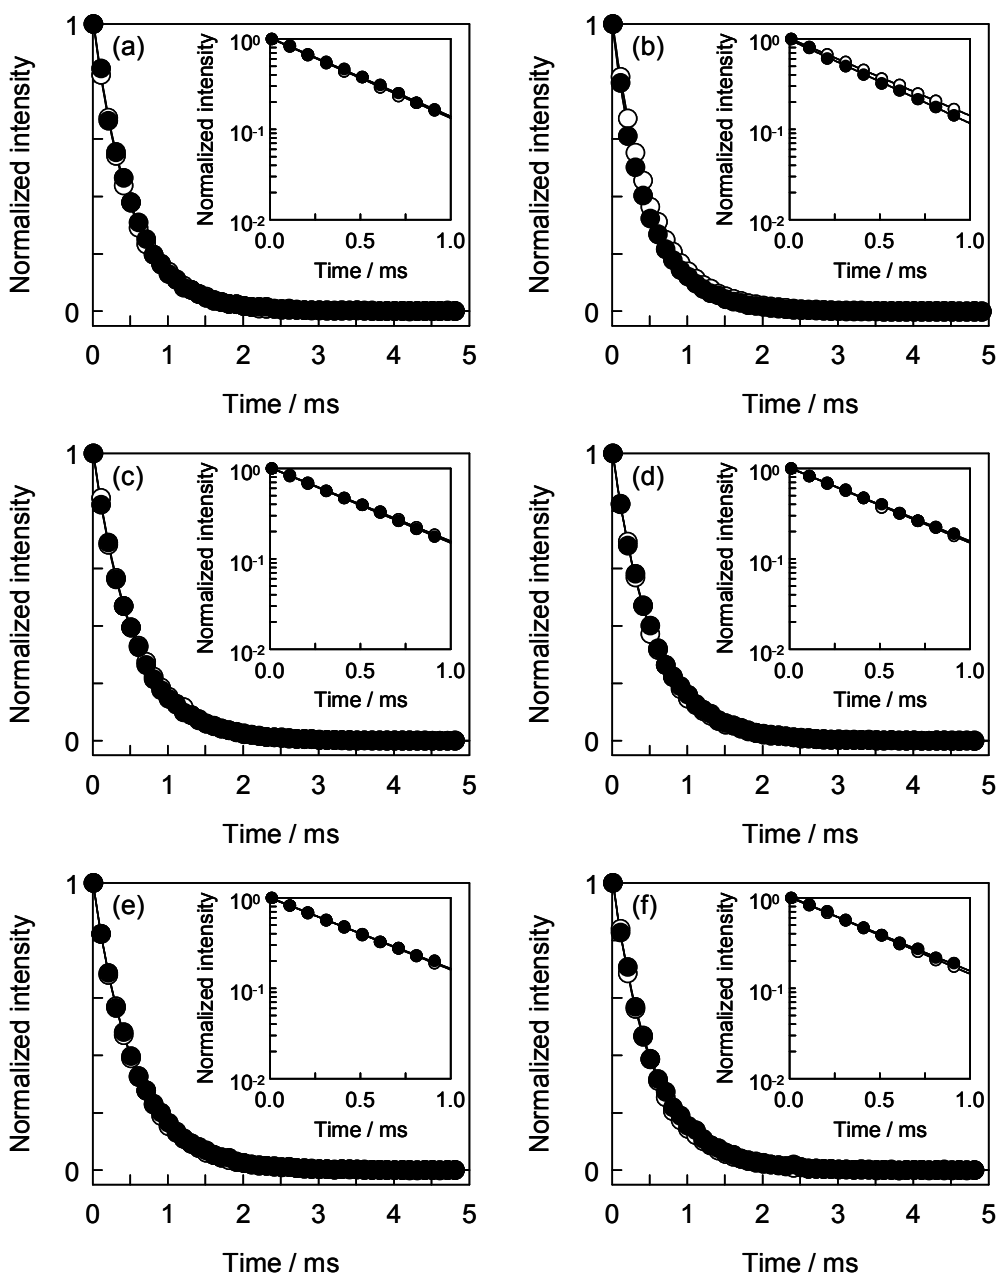

**Fig. S3** Fluorescence decay at 613 nm for  $[\text{Eu}(\text{tta})_3(\text{H}_2\text{O})_3]$  in  $[\text{C}_2\text{mim}][\text{Tf}_2\text{N}]$  (a),  $[\text{C}_4\text{mim}][\text{Tf}_2\text{N}]$  (b),  $[\text{C}_6\text{mim}][\text{Tf}_2\text{N}]$  (c),  $[\text{C}_8\text{mim}][\text{Tf}_2\text{N}]$  (d),  $[\text{C}_{10}\text{mim}][\text{Tf}_2\text{N}]$  (e), and  $[\text{C}_4\text{dmim}][\text{Tf}_2\text{N}]$  (f) saturated with  $\text{H}_2\text{O}$  (●) and  $\text{D}_2\text{O}$  (○) following pulsed 394 nm excitation. The decays were normalized at the first data point. The fluorescence decay on a logarithmic scale is presented in the inset graph, and the solid lines were obtained by a least-squares fitting. Concentration of  $[\text{Eu}(\text{tta})_3(\text{H}_2\text{O})_3]$  was  $1.0 \times 10^{-4} \text{ mol dm}^{-3}$ .

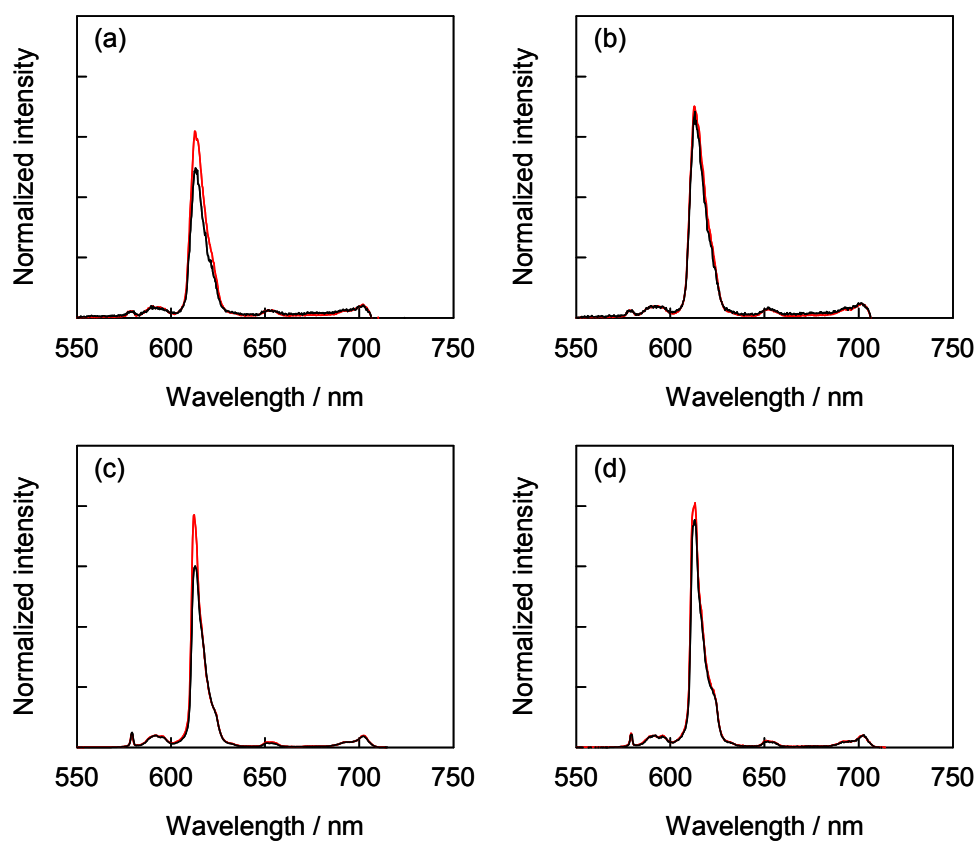

**Fig. S4** Fluorescence spectrum of  $[\text{Eu}(\text{tta})_3(\text{H}_2\text{O})_3]$  in DIPE (a), MIBK (b), benzene (c), and DCE (d) saturated with  $\text{H}_2\text{O}$  (black) and  $\text{D}_2\text{O}$  (red) following pulsed 394 nm excitation. The spectra were normalized by the intensity of the  ${}^5\text{D}_0 \rightarrow {}^7\text{F}_1$  transition. Concentration of  $[\text{Eu}(\text{tta})_3(\text{H}_2\text{O})_3]$  was  $1.0 \times 10^{-4} \text{ mol dm}^{-3}$ .

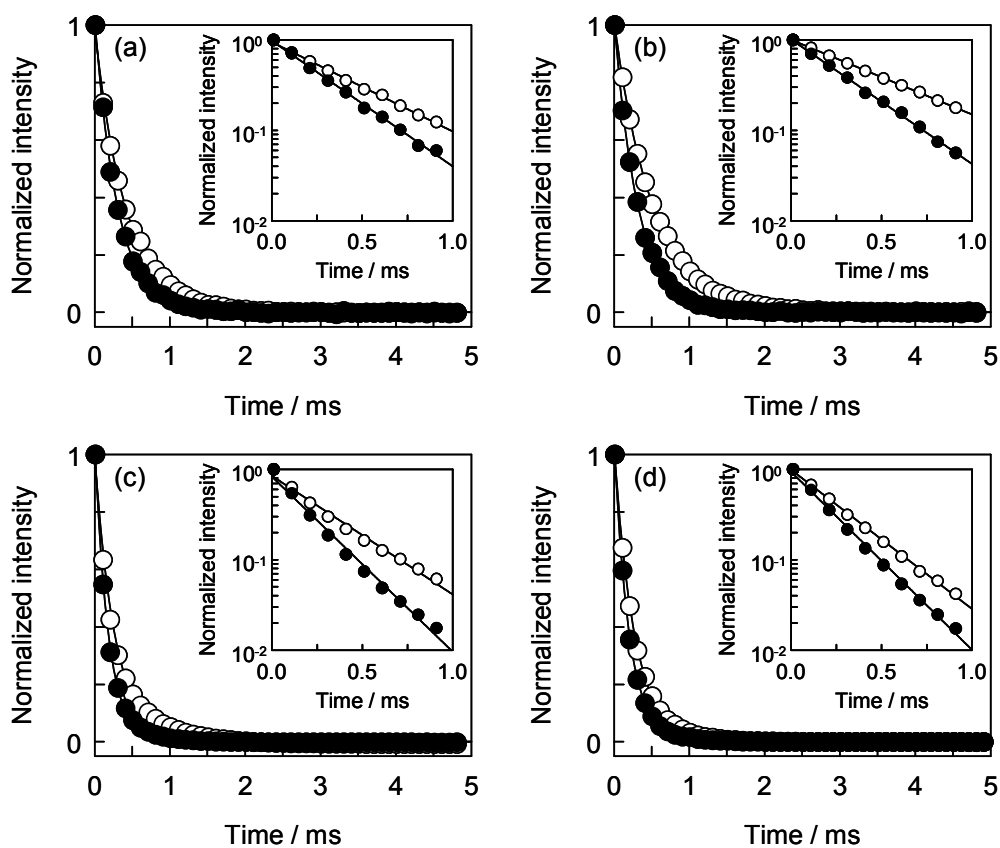

**Fig. S5** Fluorescence decay at 613 nm for [Eu(tta)<sub>3</sub>(H<sub>2</sub>O)<sub>3</sub>] in DIPE (a), MIBK (b), benzene (c), and DCE (d) saturated with H<sub>2</sub>O (●) and D<sub>2</sub>O (○) following pulsed 394 nm excitation. The decays were normalized at the first data point. The fluorescence decay on a logarithmic scale is presented in the inset graph, and the solid lines were obtained by a least-squares fitting. Concentration of [Eu(tta)<sub>3</sub>(H<sub>2</sub>O)<sub>3</sub>] was  $1.0 \times 10^{-4} \text{ mol dm}^{-3}$ .

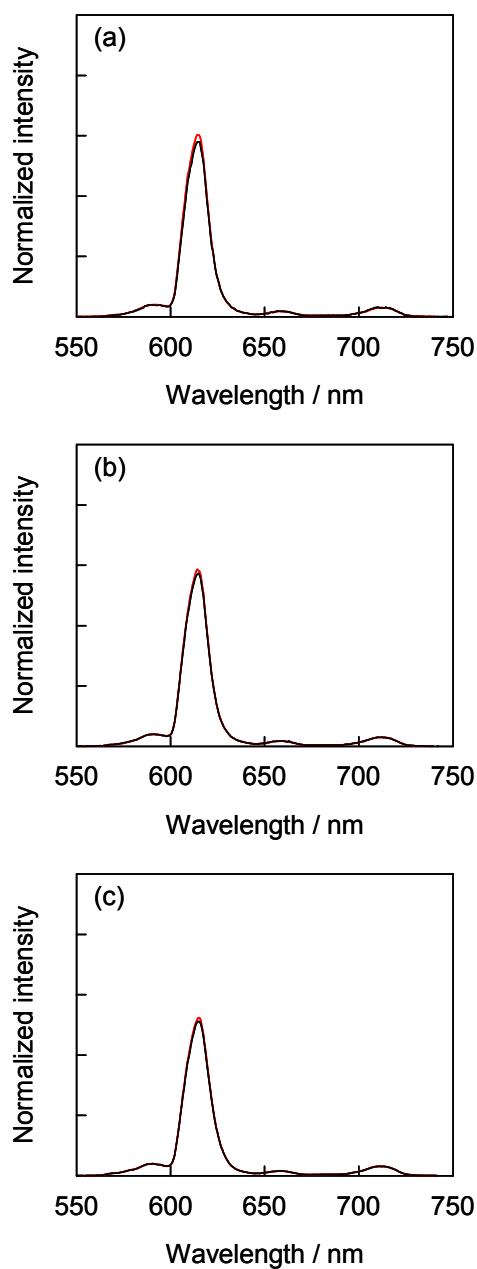

**Fig. S6** Fluorescence spectrum of  $[\text{Eu}(\text{tta})_3(\text{H}_2\text{O})_3]$  in  $[\text{C}_2\text{mim}][\text{Tf}_2\text{N}, \text{ClO}_4]$  containing  $5.0 \text{ mol dm}^{-3}$   $\text{H}_2\text{O}$  (black) and  $\text{D}_2\text{O}$  (red) (a),  $[\text{C}_2\text{mim}][\text{Tf}_2\text{N}, \text{ClO}_4]$  containing  $20 \text{ mol dm}^{-3}$   $\text{H}_2\text{O}$  (black) and  $\text{D}_2\text{O}$  (red) (b), and  $[\text{C}_2\text{mim}][\text{ClO}_4]$  containing  $20 \text{ mol dm}^{-3}$   $\text{H}_2\text{O}$  (black) and  $\text{D}_2\text{O}$  (red) (c) following pulsed  $394 \text{ nm}$  excitation. The spectra were normalized by the intensity of the  ${}^5\text{D}_0 \rightarrow {}^7\text{F}_1$  transition. Concentration of  $[\text{Eu}(\text{tta})_3(\text{H}_2\text{O})_3]$  was  $1.0 \times 10^{-4} \text{ mol dm}^{-3}$ .

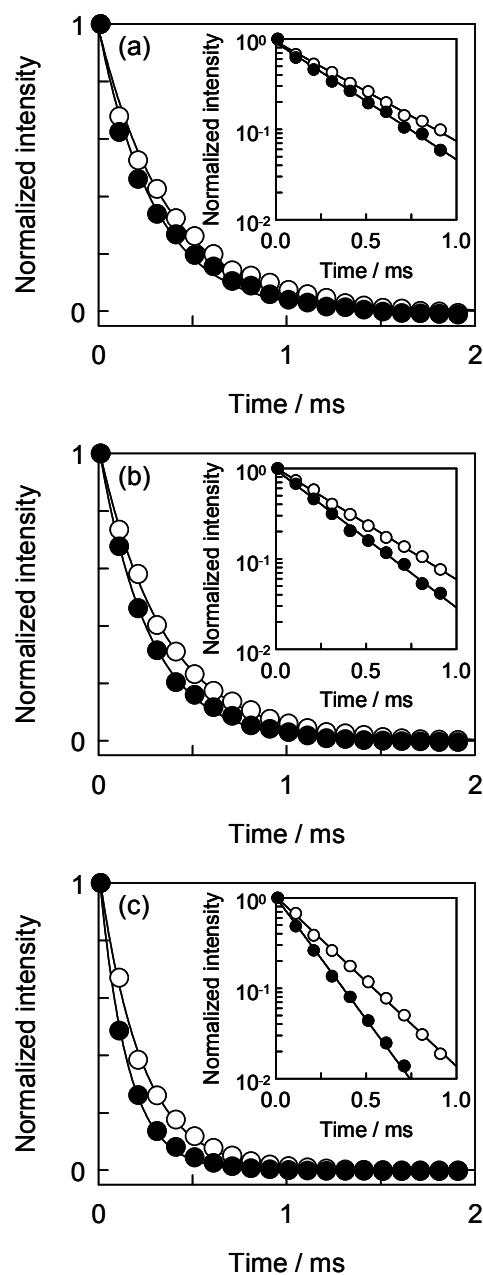

**Fig. S7** Fluorescence decay at 613 nm for  $[\text{Eu}(\text{tta})_3(\text{H}_2\text{O})_3]$  in  $[\text{C}_2\text{mim}][\text{Tf}_2\text{N}, \text{ClO}_4]$  containing  $5.0 \text{ mol dm}^{-3} \text{ H}_2\text{O}$  ( $\bullet$ ) and  $\text{D}_2\text{O}$  ( $\circ$ ) (a),  $[\text{C}_2\text{mim}][\text{Tf}_2\text{N}, \text{ClO}_4]$  containing  $20 \text{ mol dm}^{-3} \text{ H}_2\text{O}$  ( $\bullet$ ) and  $\text{D}_2\text{O}$  ( $\circ$ ) (b), and  $[\text{C}_2\text{mim}][\text{ClO}_4]$  containing  $20 \text{ mol dm}^{-3} \text{ H}_2\text{O}$  ( $\bullet$ ) and  $\text{D}_2\text{O}$  ( $\circ$ ) (c) following pulsed 394 nm excitation.  $\text{Tf}_2\text{N}^-$  concentration in the  $[\text{C}_2\text{mim}][\text{Tf}_2\text{N}, \text{ClO}_4]$  solution was  $0.50 \text{ mol dm}^{-3}$ . The decays were normalized at the first data point. The fluorescence decay on a logarithmic scale is presented in the inset graph, and the solid lines were obtained by a least-squares fitting. Concentration of  $[\text{Eu}(\text{tta})_3(\text{H}_2\text{O})_3]$  was  $1.0 \times 10^{-4} \text{ mol dm}^{-3}$ .



**Table S1** Fluorescence decay constants and the number of coordinated water molecules for [Eu(tta)<sub>3</sub>(H<sub>2</sub>O)<sub>3</sub>] dissolved in [C<sub>2</sub>mim][Tf<sub>2</sub>N, ClO<sub>4</sub>] and [C<sub>2</sub>mim][ClO<sub>4</sub>] containing H<sub>2</sub>O or D<sub>2</sub>O

| Solvent                                                    | [water] / mol dm <sup>-3</sup> | $k_{\text{H}_2\text{O}} / \text{ms}^{-1}$ | $k_{\text{D}_2\text{O}} / \text{ms}^{-1}$ | $n_{\text{H}_2\text{O}}$ |
|------------------------------------------------------------|--------------------------------|-------------------------------------------|-------------------------------------------|--------------------------|
| [C <sub>2</sub> mim][Tf <sub>2</sub> N, ClO <sub>4</sub> ] | 5.0                            | 3.33                                      | 2.72                                      | 0.6                      |
|                                                            | 20                             | 3.87                                      | 3.02                                      | 0.9                      |
| [C <sub>2</sub> mim][ClO <sub>4</sub> ]                    | 20                             | 6.84                                      | 4.57                                      | 2.4                      |

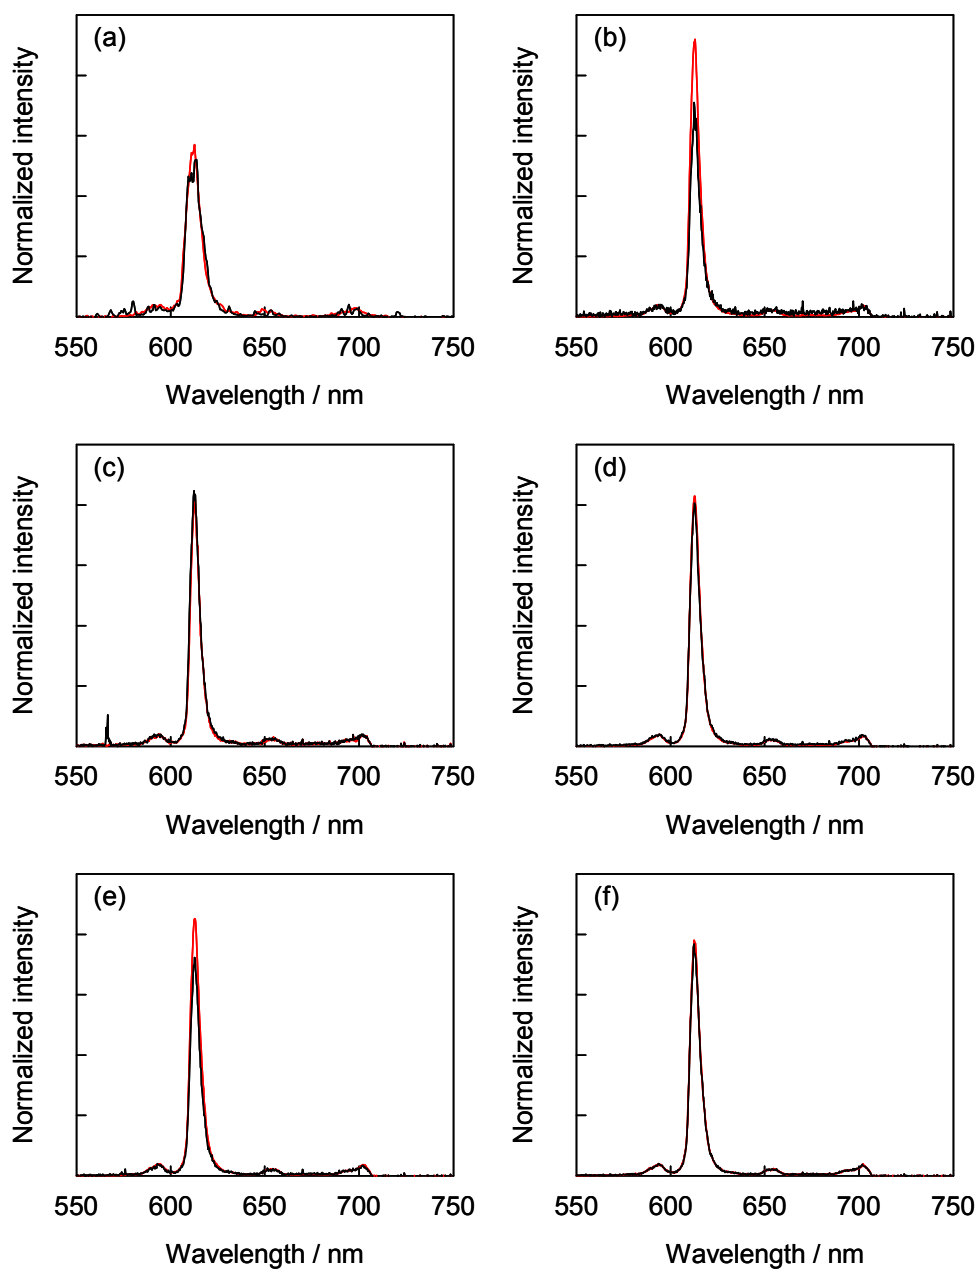

**Fig. S8** Fluorescence spectrum of  $[\text{Eu}(\text{tta})_3(\text{H}_2\text{O})_3]$  in DCE containing 0.10 vol% (a), 1.0 vol% (b), 3.0 vol% (c), 15 vol% (d), 30 vol% (e), and 50 vol% (f)  $[\text{C}_4\text{mim}][\text{Tf}_2\text{N}]$  saturated with  $\text{H}_2\text{O}$  (black) and  $\text{D}_2\text{O}$  (red) following pulsed 394 nm excitation. The spectra were normalized by the intensity of the  ${}^5\text{D}_0 \rightarrow {}^7\text{F}_1$  transition. Concentration of  $[\text{Eu}(\text{tta})_3(\text{H}_2\text{O})_3]$  was  $1.0 \times 10^{-4} \text{ mol dm}^{-3}$ .

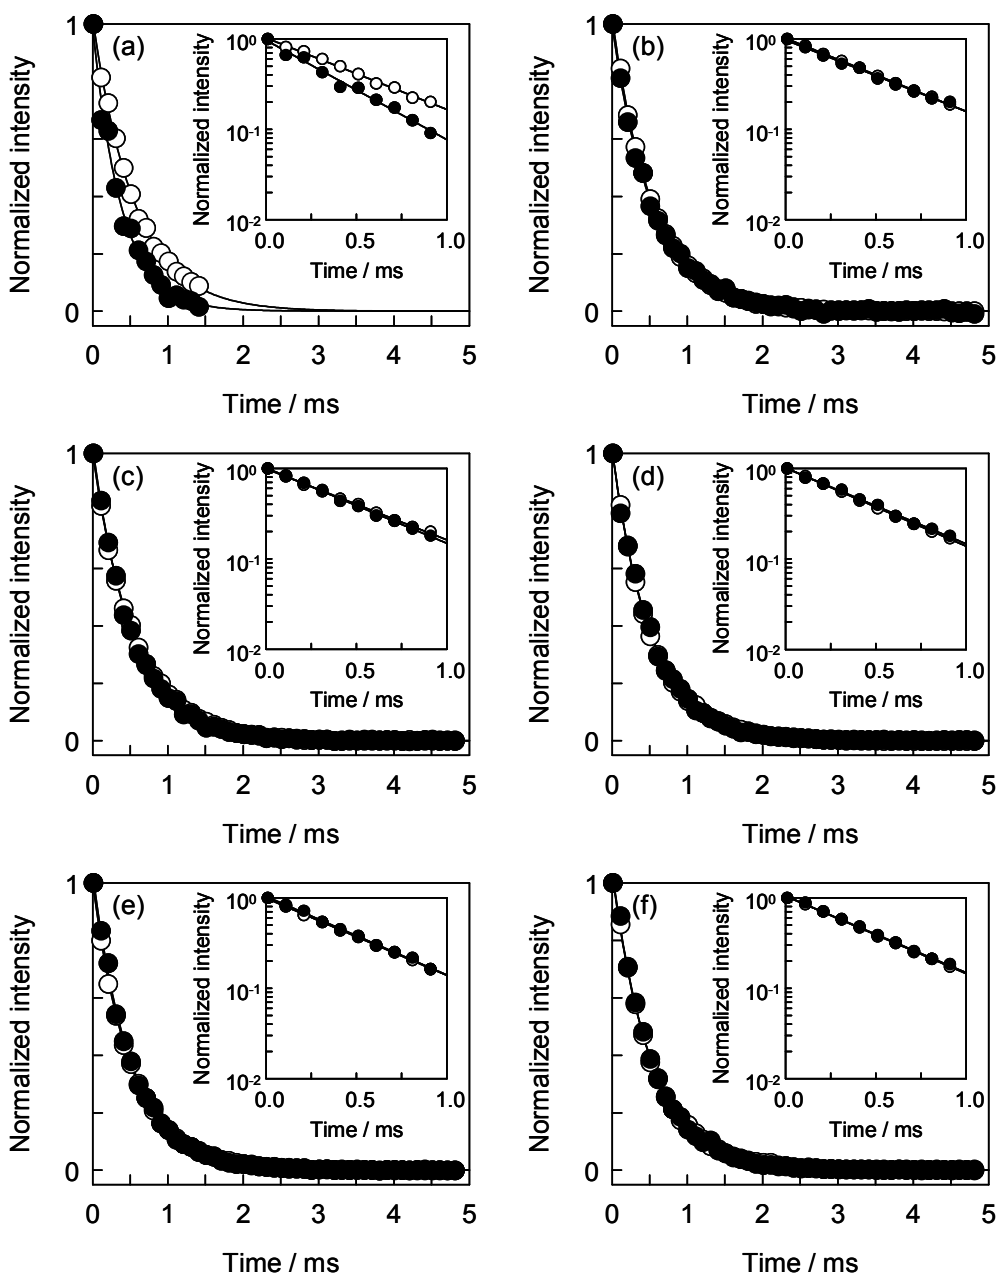

**Fig. S9** Fluorescence decay at 613 nm for  $[\text{Eu}(\text{tta})_3(\text{H}_2\text{O})_3]$  in DCE containing 0.10 vol% (a), 1.0 vol% (b), 3.0 vol% (c), 15 vol% (d), 30 vol% (e), and 50 vol% (f)  $[\text{C}_4\text{mim}][\text{Tf}_2\text{N}]$  saturated with  $\text{H}_2\text{O}$  (●) and  $\text{D}_2\text{O}$  (○) following pulsed 394 nm excitation. The decays were normalized at the first data point. The fluorescence decay on a logarithmic scale is presented in the inset graph, and the solid lines were obtained by a least-squares fitting. Concentration of  $[\text{Eu}(\text{tta})_3(\text{H}_2\text{O})_3]$  was  $1.0 \times 10^{-4} \text{ mol dm}^{-3}$ .

**Table S2** Fluorescence decay constants and the number of coordinated water molecules for [Eu(tta)<sub>3</sub>(H<sub>2</sub>O)<sub>3</sub>] dissolved in [C<sub>4</sub>mim][Tf<sub>2</sub>N] diluting with DCE, saturated with H<sub>2</sub>O or D<sub>2</sub>O

| Solvent                                     | IL fraction / vol% | [Tf <sub>2</sub> N <sup>-</sup> ] / mol dm <sup>-3</sup> | <i>k</i> <sub>H<sub>2</sub>O</sub> / ms <sup>-1</sup> | <i>k</i> <sub>D<sub>2</sub>O</sub> / ms <sup>-1</sup> | <i>n</i> <sub>H<sub>2</sub>O</sub> |
|---------------------------------------------|--------------------|----------------------------------------------------------|-------------------------------------------------------|-------------------------------------------------------|------------------------------------|
| [C <sub>4</sub> mim][Tf <sub>2</sub> N]-DCE | 0.10               | 3.4 × 10 <sup>-3</sup>                                   | 2.85                                                  | 1.99                                                  | 0.9                                |
|                                             | 1.0                | 3.4 × 10 <sup>-2</sup>                                   | 1.96                                                  | 1.86                                                  | 0.1                                |
|                                             | 3.0                | 0.10                                                     | 1.96                                                  | 1.85                                                  | 0.1                                |
|                                             | 15                 | 0.52                                                     | 1.96                                                  | 1.95                                                  | 0                                  |
|                                             | 30                 | 1.0                                                      | 1.94                                                  | 1.96                                                  | 0                                  |
|                                             | 50                 | 1.7                                                      | 1.96                                                  | 1.91                                                  | 0.1                                |

## References

- 1 K. Akiba, *Bunseki Kagaku*, 1972, **21**, 1630–1636.
- 2 Y. Kitatsuji, Y. Meguro, Z. Yoshida, T. Yamamoto and K. Nishizawa, *Solvent Extr. Ion Exch.*, 1995, **13**, 289–300.
- 3 K. Akiba and T. Kanno, *J. Inorg. Nucl. Chem.*, 1980, **42**, 273–276.
- 4 T. Wakabayashi, K. Takaizumi, K. Seto, N. Suzuki and K. Akiba, *Bull. Chem. Soc. Jpn.*, 1968, **41**, 1854–1858.
- 5 N. Suzuki, K. Akiba and T. kanno, *Anal. Chim. Acta*, 1968, **43**, 311–320.
